# Supplementary material
Source: Elsevier journal article supplement (https://www.sciencedirect.com/science/article/pii/S2238785417304167)
Supplement: mmc2 [file S2238785417304167:mmc2.doc]

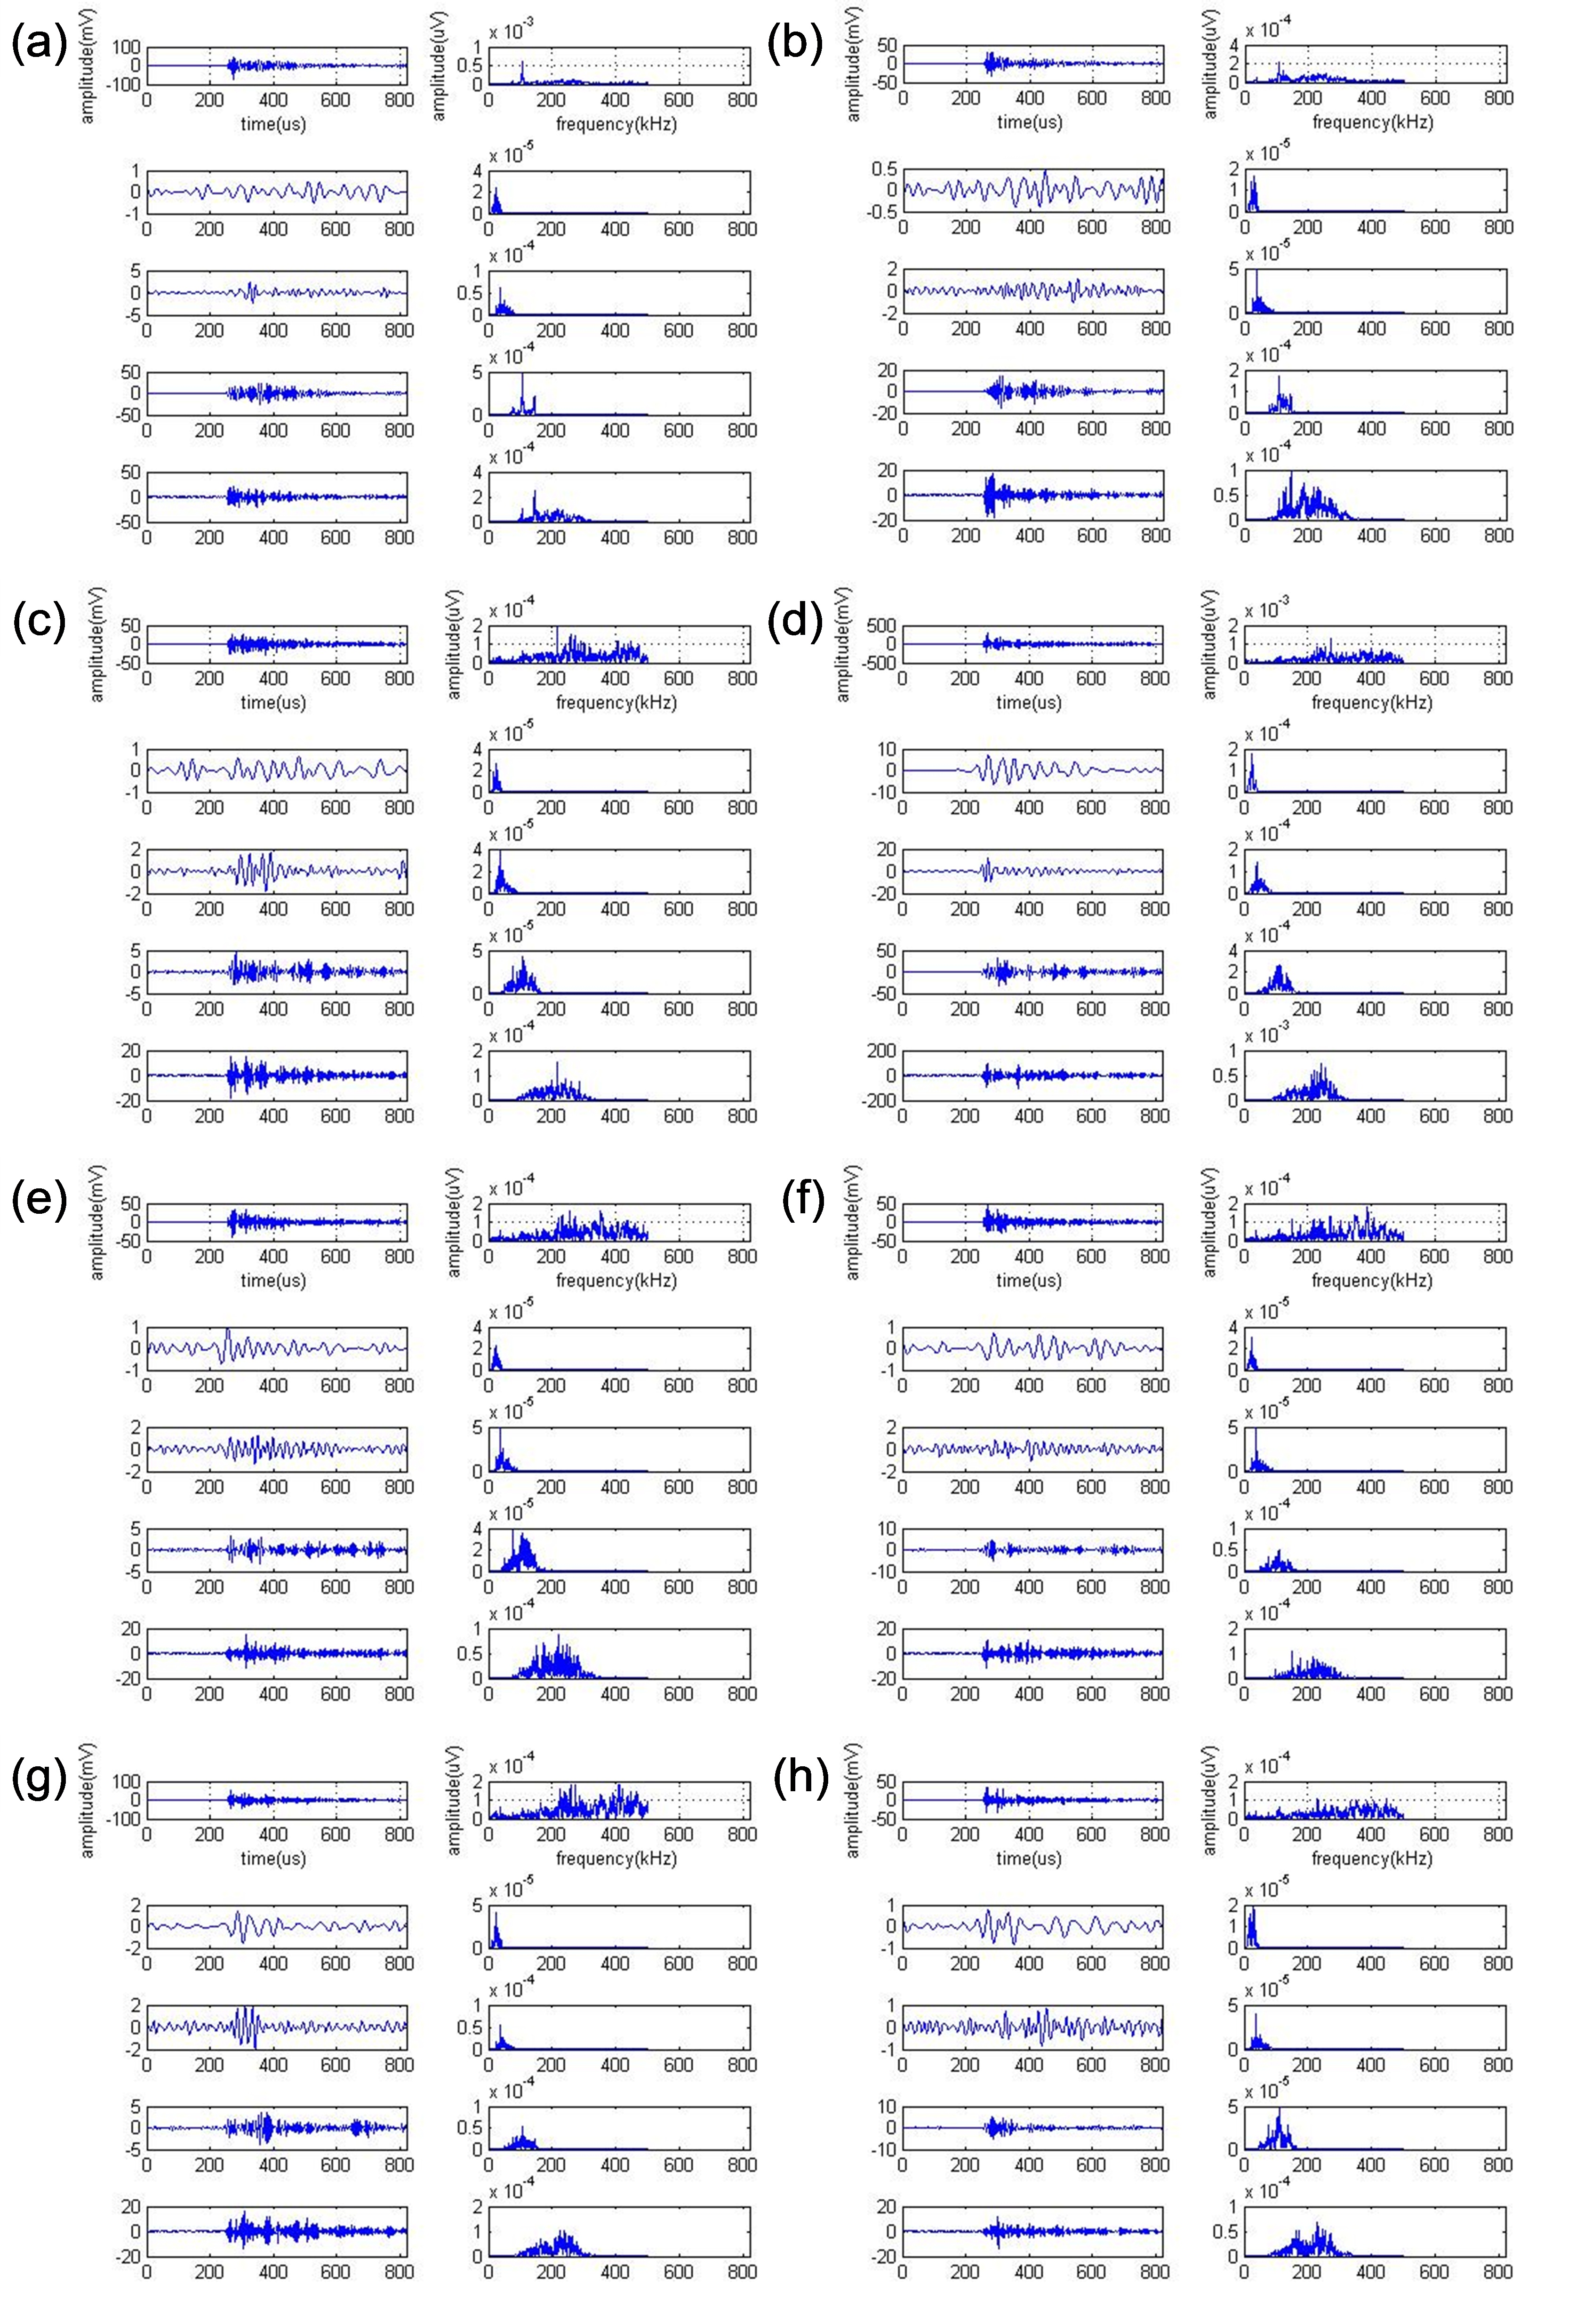


**Supplemental Fig. 2.** Wavelet energy coefficient details of the peak frequency and the corresponding spectrum. Figures (a-h) represent the No. 1-8 AE signals in Table 1.
