# Supplementary material
Source: Elsevier journal article supplement (https://www.sciencedirect.com/science/article/pii/S2238785417304167)
Supplement: mmc4 [file S2238785417304167:mmc4.doc]

**Supplemental Table 1** Chemical compositions (wt. %) of the base metal and welding impurities.

| **Compositions** | **C** | **O** | **Si** | **P** | **S** | **Ca** | **Mn** | **Fe** |
| --- | --- | --- | --- | --- | --- | --- | --- | --- |
| **Base metal (wt. %)**[27] | 0.16 | - | 0.31 | 0.022 | 0.033 | 0.10 | 1.42 | 97.96 |
| **Impurities (wt. %)** | 7.82 | 21.67 | 6.07 | - | 1.44 | - | 12.68 | 50.32 |
